# Supplementary material for: A Timeframe for SARS-CoV-2 Genomes: A Proof of Concept for Postmortem Interval Estimations
Source: MDPI journal article supplement (doi:10.3390/ijms232112899), 2022-10-25
Supplement: s1 [file s1]

## Supplementary Note S1

### A timeframe for SARS-CoV-2 genomes: a proof of concept for postmortem interval estimations

Jacobo Pardo-Seco, Xabier Bello, Alberto Gómez-Carballa, Federico Martínón-Torres, Ignacio Muñoz-Barús, Antonio Salas

#### Supplementary Methodology

Correction factor  $k$  for the estimation of the  $t_{E-QG}$

When two genomes (the RG and the QG) differ in 1, 2, or 3 substitutions,  $k$  can be calculated as follows, according to different simple phylogenetic scenarios (see also **Figure 2** in the main text and **Table S3** below):

- (i) the RG and the QG differ by one substitution: if the RG contains one more substitution than the QG ( $n_{RG} > n_{QG}$ ) this suggests a phylogenetic derived status of the RG (herein referred as model 1-SMD that states for: RG is a 1-step mutational derivative of QG), therefore  $\kappa = -\beta$  days; on the contrary, if  $n_{RG} < n_{QG}$  (model 1-SMA: RG is a 1-step mutational ancestor of QG),  $\kappa = +\beta$  days;
- (ii) the RG and the QG differ by two substitutions:  $\kappa = -2 \times \beta$  days if  $n_{RG} > n_{QG}$  and the total set of substitutions in the QG is included in the RG; that is  $QG \subseteq RG$  (model 2-SMD: RG is a 2-step mutational derivative of QG);  $\kappa = +2 \times \beta$  days if  $n_{RG} < n_{QG}$  and the substitutions of the RG  $\subseteq QG$  (model 2-SMA: RG is a 2-step mutational ancestor of QG); and  $\kappa = 0$  days if  $n_{RG} = n_{QG}$  and the substitutions of the RG  $\not\subseteq QG$  and  $QG \not\subseteq RG$  (both are sister branches in the tree);
- (iii) the RG and the QG differ by three positions,  $\kappa = -3 \times \beta$  days if  $n_{RG} > n_{QG}$  and the full substitutions in the QG  $\subseteq RG$  (model 3-SMD: RG is a 3-step mutational derivative from QG);  $\kappa = +3 \times \beta$  days if  $n_{QG} > n_{RG}$  and the full substitutions in the RG  $\subseteq QG$  (model 3-SMA: RG is a 3-step mutational ancestor from QG);  $\kappa = -\beta$  days if  $n_{RG} > n_{QG}$  and not all the substitutions in the QG  $\subseteq RG$  and  $RG \not\subseteq QG$  (model 2/1-SB: RG and QG are in sister

branches, the length of the RG branch is 2 substitutions and the length of QG is 1 substitution); and  $\kappa = +\beta$  days if  $n_{QG} > n_{RG}$  and the substitutions in the QG  $\not\subset$  RG and RG  $\not\subset$  QG (model 1/2-SB: RG and QG are in sister branches, the length of the RG branch is 1 substitution and the length of QG is 2 substitutions).

## Supplementary Results

### Time estimates based on Chronumental

Overall, Chronumental corrected times (**Table S2**) do not improve estimates of  $t_{E-QG}$  with respect to estimates obtained from non-corrected  $t_{R-RG}$  (**Table 1** from main text), with only a few exceptions. Preliminary results using TreeTime [1] did not improve our results (e.g. larger IQR; data not shown), the method has the added disadvantage of requiring a more sophisticated pipeline. Other alternatives were not explored further for two main reasons: *i*) the phylogenetic software used in our pipeline was not the main focus of the present study (which is not on phylogenetic reconstructions and evolutionary issues), and *ii*) UShER provides such optimal results that it already satisfies the main aim of the project, namely, to provide a proof of concept on a new way to estimate narrow sampling times of a queried viral genome using a friendly and efficient pipeline.

**Table S3.** Values related to the models and example in **Figure 2.** S: substitutions

| RG ID                    | Time     | n° of S | n° extra S | n° missing S | Correction factor      | Contributing time                      |
|--------------------------|----------|---------|------------|--------------|------------------------|----------------------------------------|
| RG = QG                  | $t_1$    | 0       | 0          | 0            | 0                      | $\kappa = t_1$                         |
| 1-SMD                    | $t_2$    | 1       | 1          | 0            | $-\beta$               | $\kappa = t_2 - \beta$                 |
| 1-SMA                    | $t_3$    | 1       | 0          | 1            | $+\beta$               | $\kappa = t_3 + \beta$                 |
| 2-SMD                    | $t_4$    | 2       | 2          | 0            | $-2 \times \beta$      | $\kappa = t_4 - 2 \times \beta$        |
| 2-SMA                    | $t_5$    | 2       | 0          | 2            | $t_5 + 2 \times \beta$ | $\kappa = t_5 + 2 \times \beta$        |
| 1/1-SB                   | $t_6$    | 2       | 1          | 1            | 0                      | $\kappa = t_6$                         |
| 3-SMD                    | $t_7$    | 3       | 3          | 0            | $+3 \times \beta$      | $\kappa = t_7 - 3 \times \beta$        |
| 3-SMA                    | $t_8$    | 3       | 0          | 3            | $-\beta$               | $\kappa = t_8 + 3 \times \beta$        |
| 2/1-SB                   | $t_9$    | 3       | 2          | 1            | $-\beta$               | $\kappa = t_9 - \beta$                 |
| 1/2-SB                   | $t_{10}$ | 3       | 1          | 2            | $+\beta$               | $\kappa = t_{10} + \beta$              |
| <i>Example Figure 2B</i> |          |         |            |              |                        |                                        |
| 1                        | $t_1$    | 2       | 0          | 2            | $+2 \times \beta$      | $\kappa_{1 QG} = t_1 + 2 \times \beta$ |
| 2                        | $t_2$    | 2       | 1          | 1            | 0                      | $\kappa_{2 QG} = t_2$                  |
| 3                        | $t_3$    | 3       | 2          | 1            | $-\beta$               | $\kappa_{3 QG} = t_3 - \beta$          |
| 4                        | $t_4$    | 0       | 0          | 0            | 0                      | $\kappa_{4 QG} = t_4$                  |
| 5                        | $t_5$    | 1       | 1          | 0            | $-\beta$               | $\kappa_{5 QG} = t_5$                  |
| 6                        | $t_6$    | 2       | 2          | 0            | $-2 \times \beta$      | $\kappa_{6 QG} = t_6 - \beta$          |
| 7                        | $t_7$    | 3       | 3          | 0            | $+3 \times \beta$      | $\kappa_{7 QG} = t_7 + 3 \times \beta$ |
| 8                        | $t_8$    | 3       | 0          | 3            | $-\beta$               | $\kappa_{8 QG} = t_8 - \beta$          |
| 9                        | $t_9$    | 3       | 2          | 1            | $-\beta$               | $\kappa_{9 QG} = t_9 - \beta$          |
| 10                       | $t_{10}$ | 4       | 3          | 1            | -                      | $\hat{u}$                              |
| 11                       | $t_{11}$ | 4       | 3          | 1            | -                      | $\hat{u}$                              |

## References

1. Sagulenko, P.; Puller, V.; Neher, R.A. TreeTime: Maximum-likelihood phylodynamic analysis. *Virus Evol* **2018**, *4*, vex042, doi:10.1093/ve/vex042.
