# Supplementary material for: A Timeframe for SARS-CoV-2 Genomes: A Proof of Concept for Postmortem Interval Estimations
Source: MDPI journal article supplement (doi:10.3390/ijms232112899), 2022-10-25
Supplement: s1 [file s1]

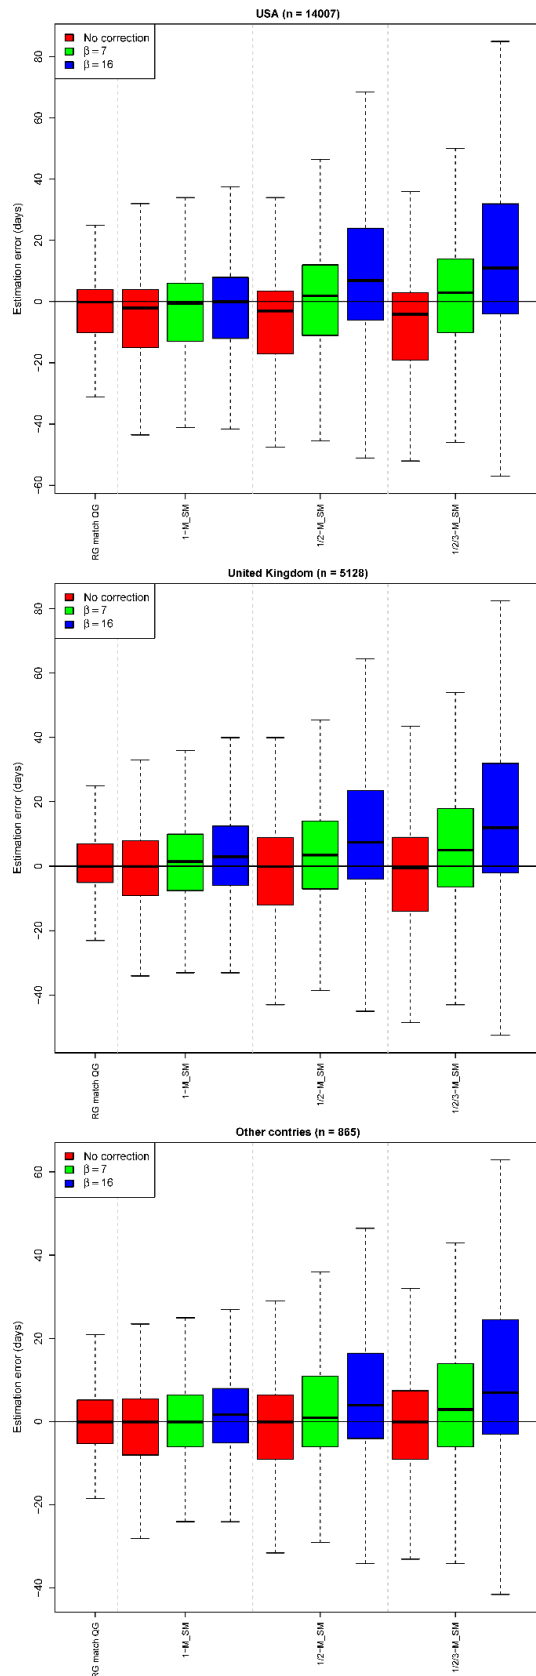

**Figure S1.** Timeframes (median values for the time of a QG ( $t_{E-QG}$ ) and interquartile ranges) for QGs sampled in different countries.  $\beta$  = time correction by a single substitution; 1-M<sub>SM</sub> = RG match or is a 1-step mutational ancestral

or derivative from QG, 1/2-M\_SM = RG match or is a 1 or 2-step mutational ancestral or derivative from QG; 1/2/3-M\_SM = RG match or is a 1, 2 or 3-step mutational ancestral or derivative from QG.

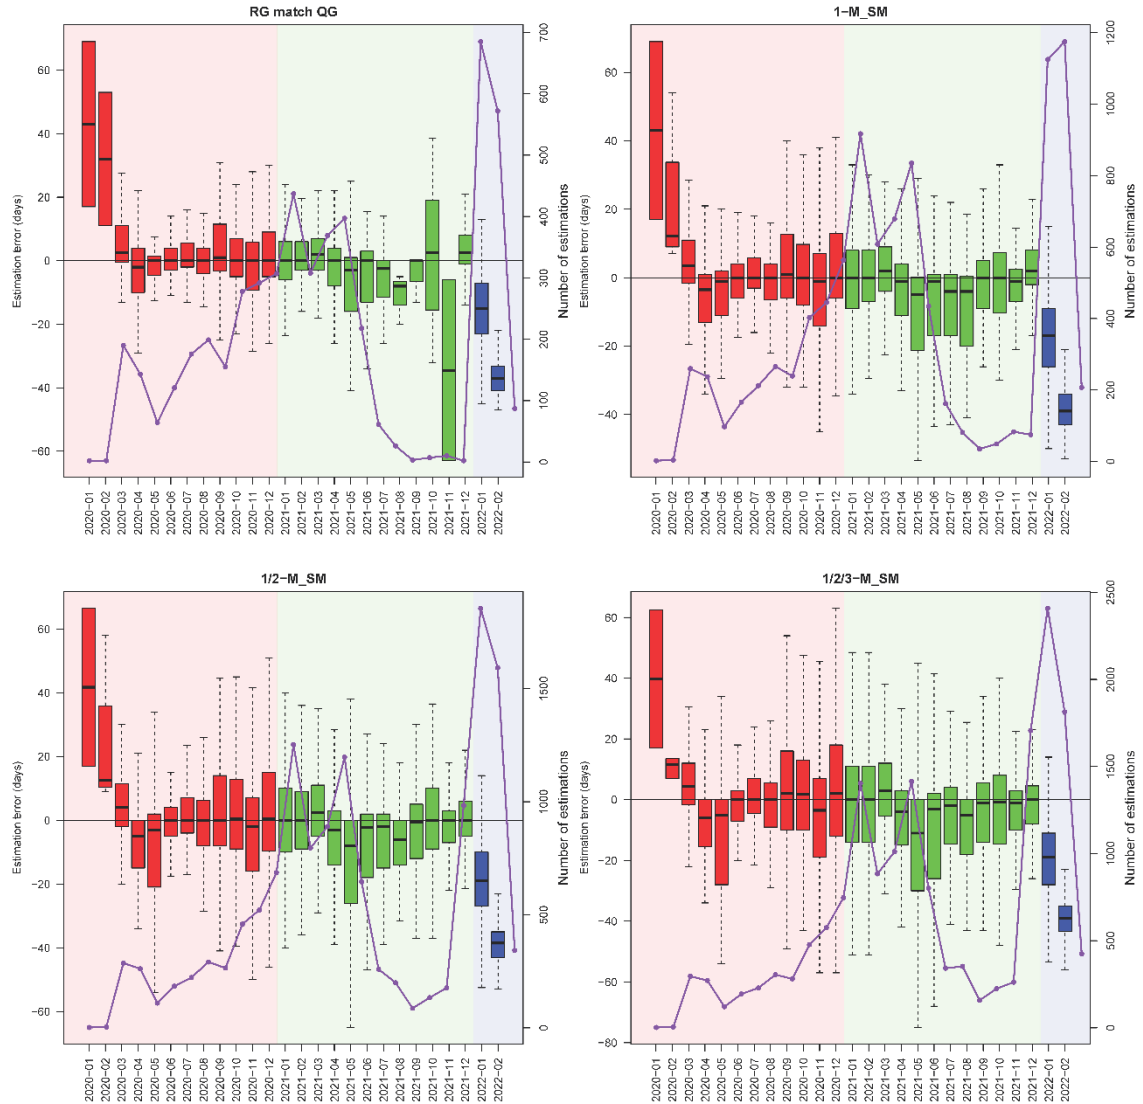

**Figure S2.** Interquartile ranges for the  $t_{E-QG}$  and various simulation models. 1-M\_SM = RG match or is a 1-step mutational ancestral or derivative from QG, 1/2-M\_SM = RG match or is a 1 or 2-step mutational ancestral or derivative from QG; 1/2/3-M\_SM = RG match or is a 1, 2 or 3-step mutational ancestral or derivative from QG; P50 = percentile 50; P75 = percentile 75, P90 = percentile 90.

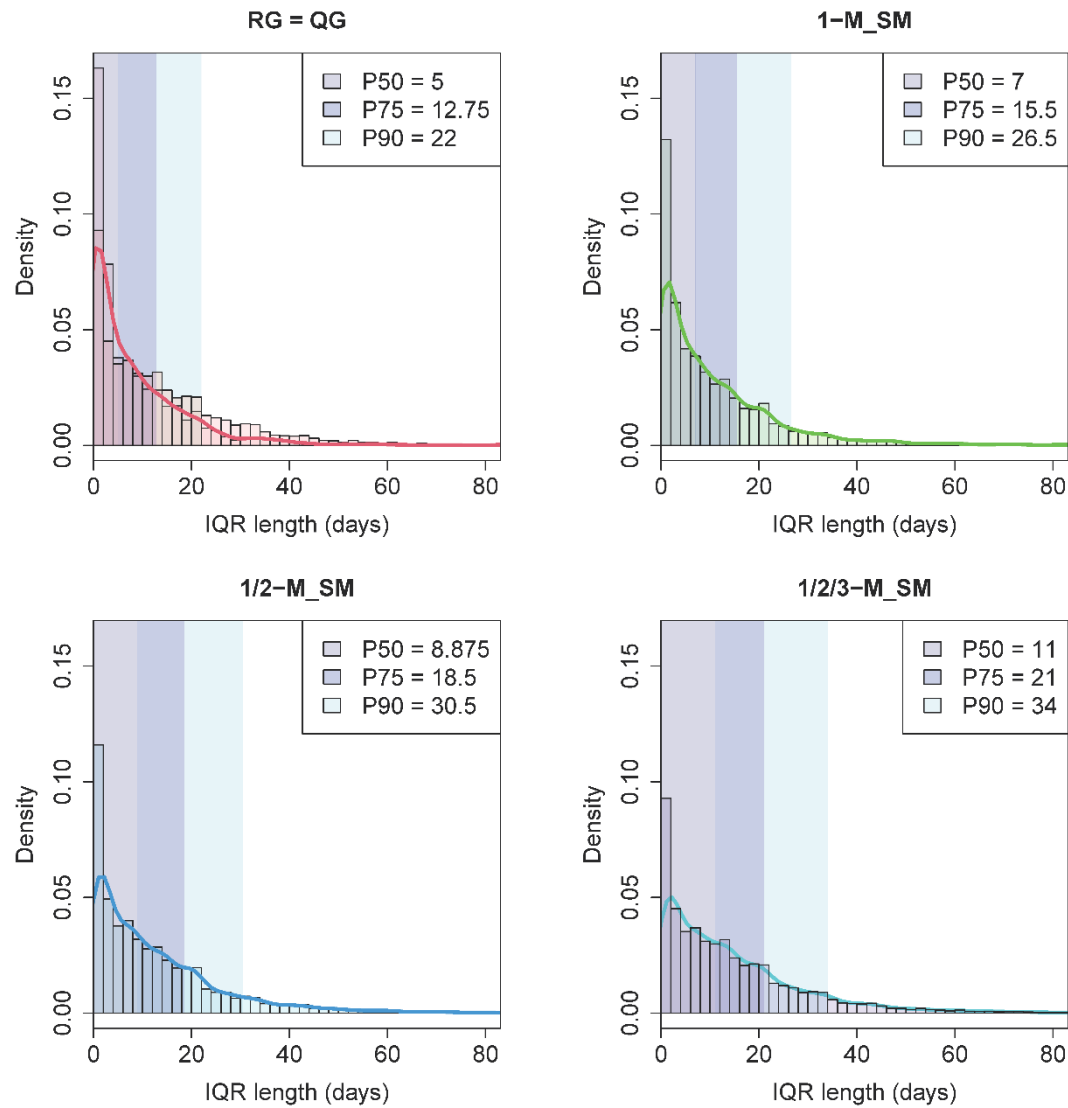

**Figure S3.** Distribution of IQR length (days) for each estimation and simulation model. 1-M\_SM = RG match or is a 1-step mutational ancestral or derivative from QG, 1/2-M\_SM = RG match or is a 1 or 2-step mutational ancestral or derivative from QG; 1/2/3-M\_SM = RG match or is a 1, 2 or 3-step mutational ancestral or derivative from QG; P50 = percentile 50; P75 = percentile 75, P90 = percentile 90.
