# Supplementary material for: A Timeframe for SARS-CoV-2 Genomes: A Proof of Concept for Postmortem Interval Estimations
Source: Int J Mol Sci. 2022 Oct 25;23(21):12899. doi: 10.3390/ijms232112899 (PMC9656715; doi:10.3390/ijms232112899)
Supplement: Supplementary file 1 [file ijms-23-12899-s001.zip]

Archive with 4 entries (4 files):
- Supplementary Figures.pdf
- Supplementary Note S1.pdf
- Table S1.xlsx
- Table S2.xlsx
