# Supplementary material for: A Timeframe for SARS-CoV-2 Genomes: A Proof of Concept for Postmortem Interval Estimations
Source: Int J Mol Sci. 2022 Oct 25;23(21):12899. doi: 10.3390/ijms232112899 (PMC9656715; doi:10.3390/ijms232112899)
Supplement: Supplementary file 1 [file ijms-23-12899-s001.zip › Table S1.xlsx]

## Sheet: Table S1
Table S1. Countries represented in the database and the random sampling of the queried genomes employed in the simulations.
Country	n in the GenBank SARS-CoV-2 reference database	Proportion in the GenBank database	n in the random sampling	Proportion in the random sampling
USA	603205	69.7	14007	70.03
United Kingdom	223855	25.87	5128	25.64
Slovakia	11437	1.32	273	1.36
Australia	9596	1.11	202	1.01
Japan	2572	0.3	49	0.24
Mexico	1800	0.21	42	0.21
Netherlands	1437	0.17	34	0.17
India	1234	0.14	24	0.12
South Africa	1047	0.12	21	0.1
Egypt	976	0.11	22	0.11
Bangladesh	737	0.09	13	0.06
Germany	687	0.08	17	0.08
New Zealand	676	0.08	14	0.07
Bahrain	560	0.06	15	0.07
Chile	374	0.04	10	0.05
Djibouti	364	0.04	10	0.05
Spain	354	0.04	13	0.06
Pakistan	263	0.03	3	0.01
Dominican Republic	260	0.03	8	0.04
China	241	0.03	2	0.01
Hong Kong	239	0.03	5	0.03
Nigeria	233	0.03	4	0.02
Kenya	196	0.02	5	0.03
Saudi Arabia	189	0.02	4	0.02
Ghana	185	0.02	1	0
Poland	154	0.02	1	0
Puerto Rico	152	0.02	3	0.01
Austria	150	0.02	4	0.02
Brazil	146	0.02	4	0.02
Serbia	146	0.02	5	0.03
Peru	139	0.02	7	0.03
Italy	121	0.01	4	0.02
Israel	118	0.01	3	0.01
Jamaica	114	0.01	4	0.02
Mongolia	107	0.01	1	0
Greece	97	0.01	2	0.01
Iraq	92	0.01	3	0.01
Switzerland	89	0.01	4	0.02
Malaysia	84	0.01	4	0.02
Gabon	72	0.01	1	0
Taiwan	60	0.01	2	0.01
Sierra Leone	59	0.01	3	0.01
Tunisia	58	0.01	1	0
Unknown	58	0.01	3	0.01
Turkey	47	0.01	2	0.01
Philippines	44	0.01	2	0.01
Argentina	38	0	0	0
Russia	37	0	1	0
Malawi	32	0	1	0
Uruguay	32	0	0	0
South Korea	31	0	0	0
Canada	29	0	0	0
Mali	28	0	1	0
Myanmar	27	0	0	0
Czech Republic	24	0	1	0
Venezuela	24	0	0	0
Finland	23	0	0	0
Jordan	23	0	1	0
Georgia	21	0	0	0
Thailand	20	0	0	0
Uzbekistan	18	0	0	0
Ethiopia	17	0	0	0
Morocco	15	0	0	0
Romania	15	0	0	0
Uganda	15	0	2	0.01
Benin	12	0	0	0
Iran	12	0	1	0
France	10	0	0	0
Guatemala	10	0	1	0
Palau	10	0	0	0
Libya	8	0	1	0
Timor-Leste	8	0	0	0
Denmark	6	0	0	0
Gambia	6	0	0	0
Somalia	6	0	1	0
Sweden	6	0	0	0
Kazakhstan	5	0	0	0
Sri Lanka	5	0	0	0
Togo	5	0	0	0
Belize	4	0	0	0
Ecuador	4	0	0	0
Lebanon	4	0	0	0
Malta	4	0	0	0
Guam	3	0	0	0
Norway	3	0	0	0
Belgium	2	0	0	0
Cambodia	2	0	0	0
Colombia	2	0	0	0
Guinea	2	0	0	0
Portugal	2	0	0	0
Viet Nam	2	0	0	0
Belarus	1	0	0	0
Nepal	1	0	0	0
Zambia	1	0	0	0
