# Supplementary material for: A Timeframe for SARS-CoV-2 Genomes: A Proof of Concept for Postmortem Interval Estimations
Source: Int J Mol Sci. 2022 Oct 25;23(21):12899. doi: 10.3390/ijms232112899 (PMC9656715; doi:10.3390/ijms232112899)
Supplement: Supplementary file 1 [file ijms-23-12899-s001.zip › Table S2.xlsx]

## Sheet: Table S2
Table S2. Timeframes (median values for the time of a QG (tE-QG) and interquartile ranges) for QGs using corrected tR-RS values obtained from Chronumental.
				Real date
Phylogenny RG vs QG	Correction model	Median	1st quatile	2nd quantile	% missing	% outliers
RG match QG	No correction	0	-8	5.5	74.4	10.6	In brakets: number of different substitutions between the RG and the QG/Beta value
1-SMD (1/1)	No correction	6	-3	19	79.7	5.8	1-SMD	RG is a 1-step mutational derivative from QG
	Beta = 7	-1	-10	12	79.7	5.8	1-SMA	RG is a 1-step mutational ancestor from QG
	Beta = 16	-10	-19	3	79.7	5.8	1/1-SB	RG and QG are in sister branches of 1-step mutational length each
1-SMA (1/1)	No correction	-4	-18	3	71.5	5.4	2-SMD	RG is a 2-step mutational derivative from QG
	Beta = 7	3	-11	10	71.5	5.4	2-SMA	RG is a 2-step mutational ancestor from QG
	Beta = 16	12	-2	19	71.5	5.4	3-SMD	RG is a 3-step mutational derivative from QG
2-SMD (2/2)	No correction	10	-2	25	83.3	4.6	3-SMA	RG is a 3-step mutational ancestor from QG
	Beta = 7	-4	-16	11	83.3	4.6	2/1-SB	RG and QG are in sister branches, the length of the RG branch is 2 substitution and the length of QG is 1 substitution
	Beta = 16	-22	-34	-7	83.3	4.6	1/2-SB	RG and QG are in sister branches, the length of the RG branch is 1 substitution and the length of QG is 2 substitution
2-SMA (2/2)	No correction	-6	-22	1	69.3	5.2
	Beta = 7	8	-8	15	69.3	5.2
	Beta = 16	26	10	33	69.3	5.2
1/1-SB (2/0)	No correction	2	-10	14	75.5	5.2
3-SMD (3/3)	No correction	16	1	32	87.3	5.2
	Beta = 7	-5	-20	11	87.3	5.2
	Beta = 16	-32	-47	-16	87.3	5.2
3-SMA (3/3)	No correction	-10.5	-28	0	73	4.6
	Beta = 7	10.5	-7	21	73	4.6
	Beta = 16	37.5	20	48	73	4.6
2/1-SB (3/1)	No correction	-1	-16	10	74.1	4.1
	Beta = 7	6	-9	17	74.1	4.1
	Beta = 16	15	0	26	74.1	4.1
1/2-SB (3/1)	No correction	6	-8	21	79.6	4.7
	Beta = 7	-1	-15	14	79.6	4.7
	Beta = 16	-10	-24	5	79.6	4.7
Phylogenny RG vs QG	Correction model	Median	1st quatile	2nd quantile	% missing	% outliers
RG match QG	No correction	0	-8	5.5	74.4	10.6	1-M_SM	RG match or is a 1-step mutational ancestral or derivative from QG
1-M_SM	No correction	-1	-12.5	5.5	53.2	7.6	1/2-M_SM	RG match or is a 1 or 2-step mutational ancestral or derivative from QG
	Beta = 7	0	-11	7	53.2	7.4	1/2/3-M_SM	RG match or is a 1, 2 or 3-step mutational ancestral or derivative from QG
	Beta = 16	1	-9	9	53.2	7.2	1-SM	RG is a 1-step mutational ancestral or derivative from QG
1/2-M_SM	No correction	-2	-15	5	31.4	6.2	2-SM	RG is a 2-step mutational ancestral or derivative from QG
	Beta = 7	2	-9.375	12.5	31.4	4.8	3-SM	RG is a 3-step mutational ancestral or derivative from QG
	Beta = 16	7	-5	24	31.4	2.4
1/2/3-M_SM	No correction	-3	-17	5	16.5	5.8
	Beta = 7	3.5	-9	15	16.5	4.1
	Beta = 16	11	-3	31.5	16.5	1.8
1-SM	No correction	0	-12	9	56.8	6.9
	Beta = 7	2	-10	11	56.8	6.1
	Beta = 16	5	-12	16	56.8	3
2-SM	No correction	0	-14	10.5	38.9	6.1
	Beta = 7	3.5	-11	14.5	38.9	4.5
	Beta = 16	8	-13	28	38.9	1.2
3-SM	No correction	-0.5	-16	13	29.7	5.5
	Beta = 7	4	-11.5	19	29.7	3.5
	Beta = 16	11	-15.5	35	29.7	0.7
